# Supplementary material for: Metal–organic framework (MOF): a novel sensing platform for biomolecules
Source: Royal Society of Chemistry journal article supplement (doi:10.1039/c2cc36661d), 2012-10-23
Supplement: c2cc36661d.pdf [file c2cc36661d.pdf]

## 22 **1.2 Preparation of Cu(H<sub>2</sub>*dtoa*)**

23 Cu(H<sub>2</sub>*dtoa*) was synthesized by previous reports<sup>1</sup>. Briefly, 5% H<sub>4</sub>*dtoa* ethanol  
24 solution was added to lukewarm CuSO<sub>4</sub> aqueous solution with stirring. The black  
25 precipitate was washed with water and ethanol several times, and then separated from  
26 the supernatant fraction with the centrifuge. The gelatinous precipitate was  
27 centrifugated and dried in an evacuated desiccator for the following experiment.

## 28 **1.3 Characterization of Cu(H<sub>2</sub>*dtoa*)**

29 IR spectra were determined by a Nicolet 6700 FT-IR Spectrometer in the range 400  
30 to 4000 cm<sup>-1</sup> choosing KBr as medium. The photographs were taken with an  
31 Panasonic DMC-FX35 digital camera. IR (/cm<sup>-1</sup>) of production: 3240 /cm<sup>-1</sup>; 1534  
32 /cm<sup>-1</sup>; 1505 /cm<sup>-1</sup>; 1195 /cm<sup>-1</sup>; 1046 /cm<sup>-1</sup>; 860/cm<sup>-1</sup>; 781/cm<sup>-1</sup>, which is similar with  
33 the previous report<sup>1</sup>.

## 34 35 **1.4 Preparation of complex probe DNA/ Cu(H<sub>2</sub>*dtoa*)**

36 0.2 mg Cu(H<sub>2</sub>*dtoa*) synthesized in the above was dispersed in 1 mL distilled water  
37 by sonication. Next, the solution was mixed with 50 nM probe DNA with oscillation  
38 at room temperature in order to obtain a symmetrical and limpid solution. The mixture  
39 containing complex probe DNA/Cu(H<sub>2</sub>*dtoa*) was interacted with different targets with  
40 rocking in 37 °C for 4 h (except for the temperature and time-course study). The  
41 obtained complex was directly used for the following test.

42

### 43 **1.5 Fluorescent Measurements**

44 The fluorescence measurements were performed at room temperature on a Varian  
45 Cary Eclipse Fluorescence Spectrophotometer except specific indication. The  
46 emission spectra were collected from 500 to 650 nm with the excitation wavelength of  
47 480 nm. Both the excitation and emission slit widths were set to 10.0 nm. The  
48 fluorescence intensity at 518 nm is used for quantitative analysis.

49 The quenching efficiency ( $Q_E$ , %) was calculated by the formula:  $Q_E =$   
50  $(1 - F_M/F_0) \times 100\%$ , where  $F_M$  and  $F_0$  are fluorescence intensities at 518 nm in the  
51 presence and the absence of  $\text{Cu}(\text{H}_2\text{dtoa})$ . Fluorescence recovery was calculated by the  
52 formula:  $RE = (F_T/F_M - 1) \times 100\%$ , where  $F_T$  and  $F_M$  are fluorescence intensities at 518  
53 nm in the presence and the absence of target after the introduction of  $\text{Cu}(\text{H}_2\text{dtoa})$ .

54

### 55 **2. Optimization of condition**

56 The operational conditions should be optimized for better assay. Firstly, the dosage  
57 of  $\text{Cu}(\text{H}_2\text{dtoa})$  should be chosen properly. Once  $\text{Cu}(\text{H}_2\text{dtoa})$  is overdosed, it will  
58 adsorb the target and go against the restoration of fluorescence. As shown in Figure  
59 S1A, upon the introduction of 0.2 mg/mL  $\text{Cu}(\text{H}_2\text{dtoa})$  to probe DNA (50 nM), it is  
60 found that fluorescence intensity decreases gradually until 20  $\mu\text{L}$   $\text{Cu}(\text{H}_2\text{dtoa})$  is  
61 introduced. It is indicated that 20  $\mu\text{L}$   $\text{Cu}(\text{H}_2\text{dtoa})$  is enough to adsorb probe DNA in  
62 the solution, and at this condition, the  $Q_E$  of  $\text{Cu}(\text{H}_2\text{dtoa})$  to probe DNA is 84.6 %.  
63 Hence, 20  $\mu\text{L}$   $\text{Cu}(\text{H}_2\text{dtoa})$  are used to following experiment.

64 The fluorescent recovery has a relationship with the incubation time of complex  
65 probe DNA/ $\text{Cu}(\text{H}_2\text{dtoa})$  and target. Hence, the incubation time is investigated. The  
66 result is shown in Figure S1B. The fluorescent recovery is done with vibration in

67 37°C water bath. Upon increasing incubation time, more adsorbed probe DNA is  
68 released from Cu(H<sub>2</sub>*dtoa*), resulting in the recovery of fluorescence gradually. When  
69 the incubation time was longer than 4 h, the intensity was no longer increased,  
70 showing that it reaches a balance between probe DNA/Cu(H<sub>2</sub>*dtoa*) and probe  
71 DNA/target. Thus, 4 h is chosen as the incubation time.

72

### 73 **Reference**

74 1. S. Kanda, A. Suzuki, K. Ohkawa, *Ind. Eng. Chem. Prod. Res. Dev.* 1973, 12, 88.

75

76

77

78

79

80

81

82

83

84

85

86

87

88

89

90

91

92

93

94

**Table S1** Fluorescence intensity changes to different kinds of solutions

| MOF Fluorescence              | CuSO <sub>4</sub> | H <sub>4</sub> dtoa | Cu(H <sub>2</sub> dtoa) |
|-------------------------------|-------------------|---------------------|-------------------------|
| F <sub>0</sub> :(FAM-DNA)     | 493               | 490                 | 485                     |
| F <sub>M</sub> :(FAM-DNA+MOF) | 62                | 460                 | 75                      |
| Q <sub>E</sub>                | 87.42%            | 6.12%               | 84.53%                  |

95

96

97

98

99

100

101

102

103

104

105

106

107

108

109

110

111

112

113

114

115

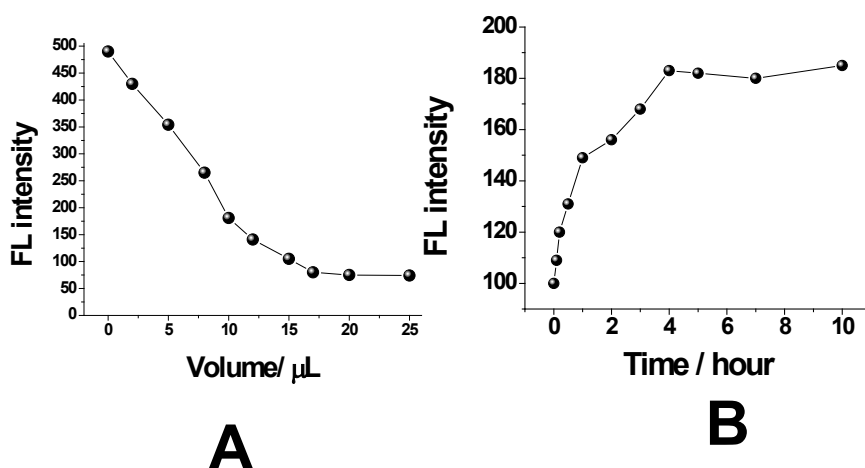

116

117 **Figure S1** (A) Fluorescence intensity of probe DNA upon the introduction of  
118 Cu(H<sub>2</sub>dtoa). (B) The influence of the incubation time between the complex probe  
119 DNA/ Cu(H<sub>2</sub>dtoa) and target on the fluorescence intensity. The fluorescence intensity  
120 is collected at 518 nm.

121
